# Supplementary material for: The Genetic Markers of Knee Osteoarthritis in Women from Russia
Source: MDPI journal article supplement (doi:10.3390/biomedicines12040782), 2024-04-02
Supplement: s1 [file s1]

**Table S2. Allele and genotype frequencies of candidate genes in patients with knee OA and in control group**

| Groups                       | N   | Allele frequencies |             |   |             | Genotype frequencies |             |    |            |    |            |
|------------------------------|-----|--------------------|-------------|---|-------------|----------------------|-------------|----|------------|----|------------|
| rs6539153 ( <i>CHST11</i> )  |     |                    |             |   |             |                      |             |    |            |    |            |
| Control                      | 161 | C                  | 134 (0,416) | T | 188 (0,584) | CC                   | 32 (0,199)  | CT | 70 (0,435) | TT | 59 (0,366) |
| Knee OA                      | 123 |                    | 108 (0,439) |   | 138 (0,561) |                      | 24 (0,195)  |    | 60 (0,488) |    | 39 (0,317) |
| rs226794 ( <i>ADAMTS5</i> )  |     |                    |             |   |             |                      |             |    |            |    |            |
| Control                      | 161 | G                  | 276 (0,857) | A | 46 (0,143)  | GG                   | 116 (0,721) | GA | 44 (0,273) | AA | 1 (0,006)  |
| Knee OA                      | 135 |                    | 222 (0,822) |   | 48 (0,178)  |                      | 90 (0,667)  |    | 42 (0,311) |    | 3 (0,022)  |
| rs2830585 ( <i>ADAMTS5</i> ) |     |                    |             |   |             |                      |             |    |            |    |            |
| Control                      | 161 | C                  | 284 (0,882) | T | 38 (0,118)  | CC                   | 126 (0,782) | CT | 32 (0,199) | TT | 3 (0,019)  |
| Knee OA                      | 137 |                    | 237 (0,865) |   | 37 (0,135)  |                      | 103 (0,752) |    | 31 (0,226) |    | 3 (0,022)  |
| rs1042667 ( <i>SOX9</i> )    |     |                    |             |   |             |                      |             |    |            |    |            |
| Control                      | 162 | A                  | 188 (0,580) | C | 136 (0,420) | AA                   | 59 (0,364)  | AC | 70 (0,432) | CC | 33 (0,204) |
| Knee OA                      | 137 |                    | 173 (0,631) |   | 101 (0,369) |                      | 56 (0,409)  |    | 61 (0,445) |    | 20 (0,146) |
| rs2229989 ( <i>SOX9</i> )    |     |                    |             |   |             |                      |             |    |            |    |            |
| Control                      | 161 | C                  | 244 (0,758) | T | 78 (0,242)  | CC                   | 92 (0,571)  | CT | 60 (0,373) | TT | 9 (0,056)  |
| Knee OA                      | 137 |                    | 206 (0,752) |   | 68 (0,248)  |                      | 78 (0,579)  |    | 50 (0,365) |    | 9 (0,066)  |
| rs7217932 ( <i>SOX9</i> )    |     |                    |             |   |             |                      |             |    |            |    |            |
| Control                      | 161 | C                  | 168 (0,522) | T | 154 (0,478) | CC                   | 44 (0,273)  | CT | 80 (0,497) | TT | 37 (0,230) |
| Knee OA                      | 124 |                    | 125 (0,504) |   | 123 (0,496) |                      | 35 (0,282)  |    | 55 (0,444) |    | 34 (0,274) |
| rs1107946 ( <i>COL1A1</i> )  |     |                    |             |   |             |                      |             |    |            |    |            |
| Control                      | 161 | C                  | 249 (0,773) | A | 73 (0,227)  | CC                   | 100 (0,621) | CA | 49 (0,304) | AA | 12 (0,075) |
| Knee OA                      | 139 |                    | 224 (0,806) |   | 54 (0,194)  |                      | 90 (0,647)  |    | 44 (0,317) |    | 5 (0,036)  |
| rs1800012 ( <i>COL1A1</i> )  |     |                    |             |   |             |                      |             |    |            |    |            |
| Control                      | 161 | G                  | 275 (0,854) | T | 47 (0,146)  | GG                   | 118 (0,733) | GT | 39 (0,242) | TT | 4 (0,025)  |
| Knee OA                      | 139 |                    | 235 (0,845) |   | 43 (0,155)  |                      | 102 (0,734) |    | 31 (0,223) |    | 6 (0,043)  |
