# Supplementary material for: The Genetic Markers of Knee Osteoarthritis in Women from Russia
Source: MDPI journal article supplement (doi:10.3390/biomedicines12040782), 2024-04-02
Supplement: s1 [file s1]

**Table S3. Allele and genotype frequencies of GWAS-replication genes in patients with knee OA and in control group**

| Groups                           | N   | Allele frequencies |             |   |             | Genotype frequencies |             |    |            |    |             |
|----------------------------------|-----|--------------------|-------------|---|-------------|----------------------|-------------|----|------------|----|-------------|
| Rs 1298744 ( <i>DOT1L</i> )      |     |                    |             |   |             |                      |             |    |            |    |             |
| Control                          | 162 | C                  | 211 (0,651) | G | 113 (0,349) | CC                   | 68 (0,420)  | CG | 75 (0,463) | GG | 19 (0,117)  |
| Knee OA                          | 139 |                    | 183 (0,658) |   | 95 (0,342)  |                      | 56 (0,403)  |    | 71 (0,511) |    | 12 (0,086)  |
| Rs2302061 ( <i>DOT1L</i> )       |     |                    |             |   |             |                      |             |    |            |    |             |
| Control                          | 161 | C                  | 41 (0,127)  | G | 281 (0,873) | CC                   | 1 (0,006)   | CG | 39 (0,242) | GG | 121 (0,752) |
| Knee OA                          | 139 |                    | 50 (0,180)  |   | 228 0,820   |                      | 6 0,043     |    | 38 (0,273) |    | 95 (0,683)  |
| Rs3204689 ( <i>ALDH1A2</i> )     |     |                    |             |   |             |                      |             |    |            |    |             |
| Control                          | 161 | C                  | 203 (0,630) | G | 119 (0,370) | CC                   | 67 (0,416)  | CG | 69 (0,429) | GG | 25 (0,155)  |
| Knee OA                          | 139 |                    | 183 (0,658) |   | 95 (0,342)  |                      | 56 (0,403)  |    | 71 (0,511) |    | 12 (0,086)  |
| Rs6976 ( <i>GLT8D1</i> )         |     |                    |             |   |             |                      |             |    |            |    |             |
| Control                          | 161 | C                  | 170 (0,528) | T | 152 (0,472) | CC                   | 43 (0,267)  | CT | 84 (0,522) | TT | 34 (0,211)  |
| Knee OA                          | 136 |                    | 159 (0,585) |   | 113 (0,415) |                      | 51 (0,375)  |    | 57 (0,419) |    | 28 (0,206)  |
| Rs11177 ( <i>CNL3</i> )          |     |                    |             |   |             |                      |             |    |            |    |             |
| Control                          | 161 | C                  | 162 (0,503) | T | 160 (0,497) | CC                   | 42 (0,261)  | CT | 78 (0,484) | TT | 41 (0,255)  |
| Knee OA                          | 139 |                    | 164 (0,590) |   | 114 (0,410) |                      | 50 (0,360)  |    | 64 (0,460) |    | 25 (0,180)  |
| Rs4836732 ( <i>ASTN2</i> )       |     |                    |             |   |             |                      |             |    |            |    |             |
| Control                          | 161 | T                  | 170 (0,528) | C | 152 (0,472) | TT                   | 40 (0,248)  | TC | 90 (0,559) | CC | 31 (0,193)  |
| Knee OA                          | 139 |                    | 140 (0,504) |   | 138 (0,496) |                      | 35 (0,251)  |    | 70 (0,504) |    | 34 (0,245)  |
| Rs9350591 ( <i>FILIP/SENP6</i> ) |     |                    |             |   |             |                      |             |    |            |    |             |
| Control                          | 161 | C                  | 285 (0,885) | T | 37 (0,115)  | CC                   | 127 (0,789) | CT | 31 (0,192) | TT | 3 (0,019)   |
| Knee OA                          | 137 |                    | 233 (0,850) |   | 41 (0,150)  |                      | 97 (0,708)  |    | 39 (0,285) |    | 1 (0,007)   |
| Rs6094710 ( <i>NCOA3</i> )       |     |                    |             |   |             |                      |             |    |            |    |             |
| Control                          | 161 | A                  | 15 (0,047)  | G | 307 (0,953) | AA                   | 1 (0,006)   | AG | 13 (0,081) | GG | 147 (0,913) |
| Knee OA                          | 137 |                    | 14 (0,051)  |   | 260 (0,949) |                      | 0           |    | 14 (0,102) |    | 123 (0,898) |
| Rs11841874 ( <i>MCF2L</i> )      |     |                    |             |   |             |                      |             |    |            |    |             |
| Control                          | 161 | A                  | 283 (0,879) | G | 39 (0,121)  | AA                   | 125 (0,776) | AG | 33 (0,205) | GG | 3 (0,019)   |
| Knee OA                          | 122 |                    | 210 (0,861) |   | 34 (0,139)  |                      | 91 (0,745)  |    | 28 (0,230) |    | 3 (0,025)   |
| Rs7639618 ( <i>DVWA</i> )        |     |                    |             |   |             |                      |             |    |            |    |             |
| Control                          | 161 | C                  | 267 (0,829) | T | 55 (0,171)  | CC                   | 115 (0,714) | CT | 37 (0,230) | TT | 9 (0,056)   |
| Knee OA                          | 139 |                    | 211 (0,759) |   | 67 (0,241)  |                      | 81 (0,583)  |    | 49 (0,352) |    | 9 (0,065)   |
| Rs835787 ( <i>CHST11</i> )       |     |                    |             |   |             |                      |             |    |            |    |             |
| Control                          | 162 | T                  | 220 (0,679) | C | 104 (0,321) | TT                   | 72 (0,444)  | CT | 76 (0,470) | CC | 14 (0,086)  |
| Knee OA                          | 115 |                    | 160 (0,696) |   | 70 (0,304)  |                      | 56 (0,487)  |    | 48 (0,417) |    | 11 (0,096)  |
