# Supplementary material for: The Genetic Markers of Knee Osteoarthritis in Women from Russia
Source: MDPI journal article supplement (doi:10.3390/biomedicines12040782), 2024-04-02
Supplement: s1 [file s1]

**Table S1. VNTR allele frequencies of the *ACAN* gene polymorphism in women with knee OA and controls.**

| Group              | Alleles      |              |              |              |              |              |               |               |                |                |               |              |
|--------------------|--------------|--------------|--------------|--------------|--------------|--------------|---------------|---------------|----------------|----------------|---------------|--------------|
|                    | 19           | 20           | 21           | 22           | 23           | 24           | 25            | 26            | 27             | 28             | 29            | 30           |
| Knee OA<br>(N=137) | 0            | 1<br>(0,004) | 1<br>(0,004) | 2<br>(0,007) | 2<br>(0,007) | 0            | 6<br>(0,022)  | 36<br>(0,131) | 141<br>(0,515) | 78<br>(0,285)  | 5<br>(0,018)  | 2<br>(0,007) |
| Control<br>(N=161) | 1<br>(0,003) | 0            | 1<br>(0,003) | 0            | 1<br>(0,003) | 1<br>(0,003) | 13<br>(0,040) | 52<br>(0,162) | 128<br>(0,398) | 117<br>(0,363) | 8<br>(0,025)  | 0            |
| Total<br>(N=298)   | 1<br>(0,002) | 1<br>(0,002) | 2<br>(0,003) | 2<br>(0,003) | 3<br>(0,005) | 1<br>(0,002) | 19<br>(0,033) | 88<br>(0,148) | 269<br>(0,451) | 195<br>(0,327) | 13<br>(0,021) | 2<br>(0,003) |
